## CORRECTION

# Correction: Scientific and engineering practices aligned with the NGSS in the performance of secondary stage physics teachers

Mohammad Khair M. Al-Salamat

There are errors in the Funding section. The correct Funding statement is: This study was funded by the Deanship of Scientific Research at Taif University, Kingdom of Saudi Arabia (Grant No. 1-1442-34) awarded to Mohammad Khair Alsalamat. The funders had no role in the study design, data collection and analysis, the decision to publish, or the preparation of the manuscript.

## Reference

1. Al-Salamat MKM (2022) Scientific and engineering practices aligned with the NGSS in the performance of secondary stage physics teachers. PLoS ONE 17(10): e0275158. <https://doi.org/10.1371/journal.pone.0275158> PMID: 36215309

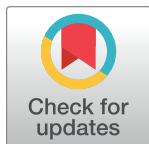

## OPEN ACCESS

**Citation:** Al-Salamat MKM (2023) Correction: Scientific and engineering practices aligned with the NGSS in the performance of secondary stage physics teachers. PLoS ONE 18(10): e0292771. <https://doi.org/10.1371/journal.pone.0292771>

**Published:** October 5, 2023

**Copyright:** © 2023 Mohammad Khair M. Al-Salamat. This is an open access article distributed under the terms of the [Creative Commons Attribution License](https://creativecommons.org/licenses/by/4.0/), which permits unrestricted use, distribution, and reproduction in any medium, provided the original author and source are credited.
